# Supplementary material
Source: publisher site journal article supplement (https://www.dovepress.com/get_supplementary_file.php?f=409659.xlsx)
Supplement: Supplementary file 1 [file get_supplementary_file.php]

## Sheet: S1
Supplementary table S1. Chemical constituents of Four Herbal Medicines Constitutive of YJZYT.
Drug Name	Molecule Name
BAISHAO	(+)-catechin
BAISHAO	(3S,5R,8R,9R,10S,14S)-3,17-dihydroxy-4,4,8,10,14-pentamethyl-2,3,5,6,7,9-hexahydro-1H-cyclopenta[a]phenanthrene-15,16-dione
BAISHAO	11alpha,12alpha-epoxy-3beta-23-dihydroxy-30-norolean-20-en-28,12beta-olide
BAISHAO	Benzoic Acid
BAISHAO	benzoyl paeoniflorin
BAISHAO	beta-sitosterol
BAISHAO	Catechin
BAISHAO	Gallicacid
BAISHAO	kaempferol
BAISHAO	Lactiflorin
BAISHAO	Mairin
BAISHAO	Paeonianiin E
BAISHAO	Paeonianin C
BAISHAO	paeoniflorgenone
BAISHAO	paeoniflorin
BAISHAO	Paeonol
BAISHAO	Palbinone
BAISHAO	Phenol
BAISHAO	sitosterol
DANGGUI	()-Camphoric acid
DANGGUI	1,1,5-Trimethyl-2-Formyl-Cyclohexa-2,5-Diene-4-One
DANGGUI	1-Hexadecanol
DANGGUI	1-Tetradecanol
DANGGUI	2,3-Dicresol
DANGGUI	2',4'-Dihydroxyacetophenone
DANGGUI	20-Hexadecanoylingenol
DANGGUI	24,24-Dimethyl-5alpha-Cholesta-8-En-3beta-Ol
DANGGUI	2-Methyl-Dodecane-5-One
DANGGUI	3-O-trans ferulylquinic acid
DANGGUI	5-Hydroxycoumarin,Guaiacol
DANGGUI	6-Undecanol
DANGGUI	adenine
DANGGUI	Alpha-Terpineol
DANGGUI	Angelicin
DANGGUI	Anisic Acid
DANGGUI	Azelaic Acid
DANGGUI	beta-sitosterol
DANGGUI	Brefeldin A
DANGGUI	Carvacrol
DANGGUI	Cedrol
DANGGUI	Choline
DANGGUI	cis-ligustilide
DANGGUI	Coniferyl ferulate
DANGGUI	Decanoic Acid
DANGGUI	Dodecanol
DANGGUI	Ethanol
DANGGUI	FERULIC ACID (CIS)
DANGGUI	Guanosine
DANGGUI	Hemo-sol
DANGGUI	Hexadecanoic Acid
DANGGUI	Homosenkyunolide H
DANGGUI	Homosenkyunolide I
DANGGUI	Isoeugenol
DANGGUI	Maruzen M
DANGGUI	Niacin
DANGGUI	nicotinic acid
DANGGUI	O-Cresol
DANGGUI	Pavilion
DANGGUI	P-Cresol
DANGGUI	Phenol
DANGGUI	Phenylacetic Acid
DANGGUI	Retinol
DANGGUI	Scopoletin
DANGGUI	Sebacic Acid
DANGGUI	Stigmasterol
DANGGUI	Succinic Acid
DANGGUI	Uridine
DANGGUI	Vanillin
DANGGUI	Vitamin B1
DANGGUI	Vitamin B12
SHANZHUYU	2,6,10,14,18-pentamethylicosa-2,6,10,14,18-pentaene
SHANZHUYU	20-Hexadecanoylingenol
SHANZHUYU	3,4-Dehydrolycopen-16-al
SHANZHUYU	3,5-Dihydroxybenzoic Acid
SHANZHUYU	3,6-Digalloylglucose
SHANZHUYU	Aristolone
SHANZHUYU	beta-sitosterol
SHANZHUYU	Cornudentanone
SHANZHUYU	Diop
SHANZHUYU	Ethyl linolenate
SHANZHUYU	Ethyl oleate (NF)
SHANZHUYU	Eugenol Methyl Ether
SHANZHUYU	gallic acid-3-O-(6'-O-galloyl)-glucoside
SHANZHUYU	Gallicacid
SHANZHUYU	gemin D
SHANZHUYU	Hydroxygenkwanin
SHANZHUYU	Isoamyl Alcohol
SHANZHUYU	Isoasarone
SHANZHUYU	Isotetrandrine
SHANZHUYU	lanosta-8,24-dien-3-ol,3-acetate
SHANZHUYU	Leucanthoside
SHANZHUYU	malkangunin
SHANZHUYU	Mandenol
SHANZHUYU	poriferast-5-en-3beta-ol
SHANZHUYU	Retinol
SHANZHUYU	sitosterol
SHANZHUYU	Stigmasterol
SHANZHUYU	Telocinobufagin
SHANZHUYU	Tetrahydroalstonine
SHANZHUYU	ursolic acid
SHANZHUYU	Vitamin B1
SHUDIHUANG	Ajugol
SHUDIHUANG	Arachic acid
SHUDIHUANG	Aucubin
SHUDIHUANG	METHYL PALMITOLEATE
SHUDIHUANG	sitosterol
SHUDIHUANG	Stachyose
SHUDIHUANG	Stigmasterol
SHUDIHUANG	sucrose
SHUDIHUANG	Uridine

## Sheet: S2
Supplementary table S2. GO of the Putative Targets of YJZYT in TE Treatment
Category	Term	Count	PValue	Genes
GOTERM_MF_DIRECT	GO:0019899~enzyme binding	30	1.39855e-17	TOP2A, HDAC2, CYP3A4, PTGS2, RELA, MAPK8, RXRA, CCND1, AKT1, HMOX1, NCOA1, PTPN1, JUN, GSTM1, TGFB1, STAT1, PRKCD, PRKCA, ESR1, ESR2, NFKB1, NFKBIA, AR, CREB1, SLPI, CYP1A1, BIRC5, PPARG, PGR, TP53
GOTERM_MF_DIRECT	GO:0004879~RNA polymerase II transcription factor activity, ligand-activated sequence-specific DNA binding	15	1.00832e-16	ESRRA, SREBF1, VDR, NR1I3, STAT3, AHR, NR3C1, ESR1, ESR2, NR3C2, AR, RXRA, PGR, PPARG, PPARA
GOTERM_MF_DIRECT	GO:0042802~identical protein binding	56	9.75654e-16	GLTP, ALK, FAAH, NR3C1, FGF2, TNF, PIK3CG, ACTB, SLC6A4, CASP9, IKBKB, CASP8, RUVBL2, AKT1, KCNH2, HSP90AA1, ANXA1, CSNK2A1, FOS, MIF, MMP9, CREB1, SOAT1, CSNK2B, KCNMA1, BIRC5, PPARG, PGR, TP53, FTL, ADRB2, FHIT, RELA, INS, DPP4, RXRA, HMOX1, MAPK1, HAS2, DRD2, NQO1, JUN, TGFB1, STAT1, INSR, STAT3, ESR1, NFKB1, VEGFA, NFKBIA, FASN, ALB, BCL2, LCN2, BAX, BCL2L1
GOTERM_MF_DIRECT	GO:0005496~steroid binding	12	2.66971e-15	ESRRA, HSD11B1, HSD11B2, AR, GPER1, PGR, CYP3A4, NR3C1, SHBG, ESR1, ESR2, NR3C2
GOTERM_MF_DIRECT	GO:0042803~protein homodimerization activity	34	1.03822e-13	TOP2A, CEBPB, AMHR2, CHRNA7, LPL, AHR, ADRB2, TYMS, PTGS2, RELA, DPP4, HSD11B1, IKBKB, RUVBL2, AKT1, HMOX1, XDH, MCL1, ACVR1, KCNH2, CUBN, HSP90AA1, GSTM1, NOS2, STAT1, STAT3, NR0B1, VEGFA, BCL2, PECAM1, BAX, BIRC5, MMACHC, BCL2L1
GOTERM_MF_DIRECT	GO:0005506~iron ion binding	16	1.04479e-11	PTGIS, P3H1, PLOD3, PLOD1, P3H3, CYP3A4, CYP17A1, CYP2B6, P4HA2, ALOX5, CYP1A1, LCN2, CYP1B1, ACO2, XDH, FTL
GOTERM_MF_DIRECT	GO:0005515~protein binding	161	6.14663e-10	GLTP, FAAH, CSF2, AMHR2, HP, PLOD3, PLAT, AHR, PLOD1, COMT, NR3C1, FGF2, TNF, ACTB, ICAM1, NR3C2, HOXA10, LGALS3, CCND2, CCND1, PLAU, RUVBL2, CYP1B1, AKT1, ACVR1, KCNH2, CUBN, CSNK2A1, PRKCB, PRKCD, P3H1, PRKCA, SDHC, MIF, SDHD, SDHA, SDHB, SULT2B1, AR, SLPI, SOAT1, RBP1, CSNK2B, PGR, TP53, FTL, DNMT1, ABCB1, MAOA, CHRNA7, LPL, ADRB2, PLD1, FHIT, DPP4, MAP2, ABL1, HMOX1, DRD2, APOB, PPARGC1A, MCL…
GOTERM_MF_DIRECT	GO:0003707~steroid hormone receptor activity	8	1.64537e-09	ESRRA, RXRA, GPER1, PGR, PPARA, ESR1, ESR2, NR3C2
GOTERM_MF_DIRECT	GO:0016491~oxidoreductase activity	17	2.00976e-09	CBR1, NOS2, SRD5A2, MAOA, NOS3, CYP3A4, SDHA, COX5A, CYP17A1, HSD11B1, HSD11B2, FASN, ALDH1A2, ALDH1A1, CYP1A1, XDH, MMACHC
GOTERM_MF_DIRECT	GO:0008134~transcription factor binding	16	2.26266e-09	JUN, HDAC2, STAT3, NR0B1, AHR, FOS, HDAC9, ESR1, NFKBIA, AR, CCND1, CSNK2B, PPARG, PPARA, PPARGC1A, TP53
GOTERM_CC_DIRECT	GO:0032991~macromolecular complex	30	6.88017e-12	ALK, TOP2A, CDKN1A, ARF1, HDAC2, AHR, NR3C1, PTGS2, TNF, ACTB, CASP9, CASP8, ABL1, AKT1, MAPK1, NCOA1, SREBF1, NCOA2, PTPN1, HSP90AA1, ANXA1, STAT1, P3H1, ESR1, AR, ALB, BCL2, PECAM1, BIRC5, TP53
GOTERM_CC_DIRECT	GO:0070062~extracellular exosome	54	1.44395e-11	ALK, ARF1, HP, PLOD3, AKR1B1, PLAT, FASLG, PLOD1, SLC2A4, COMT, ACTB, ICAM1, LGALS3, ALDH2, PLAU, ANPEP, RUVBL2, CTSB, CUBN, CBR1, HSP90AA1, ANXA1, PRKCB, PRKCD, P3H1, ACSL4, PRKCA, MIF, F2, MMP9, SULT2B1, SLPI, CSNK2B, ALDH1A1, PECAM1, CHI3L1, FTL, ABCB1, ADCY1, PTGS1, DPP4, PPP2CA, APOB, ACE, VCAM1, INSR, AKR1C1, FASN, ALB, CDK1, LCN2, RAB9A, BAX, SHBG
GOTERM_CC_DIRECT	GO:0005829~cytosol	93	2.3124e-11	GLTP, CDKN1A, ARF1, AKR1B1, AHR, SLC2A4, COMT, NR3C1, PIK3CG, ACTB, NR3C2, CASP9, IKBKB, LGALS3, CASP8, CCND2, CCND1, GPER1, CASP3, RUVBL2, AKT1, JAK1, NCOA1, SREBF1, CUBN, CBR1, HSP90AA1, ANXA1, CSNK2A1, PRKCB, PRKCD, PRKCA, FOS, MIF, SULT2B1, AR, ALDH1A2, IL1B, CSNK2B, RBP1, ALDH1A1, BIRC5, PPARG, PGR, TP53, FTL, PRKAA1, NNMT, MAOA, NR1I3, TYMS, FHIT, RELA, AURKB, PPP2CA, MAPK8, RXRA, MAP2, ALO…
GOTERM_CC_DIRECT	GO:0005615~extracellular space	47	6.09392e-10	PRSS1, CSF2, PLA2G1B, HP, PLOD3, AKR1B1, LPL, PLAT, FASLG, FGF2, TNF, ACTB, INS, ICAM1, THBD, LGALS3, PLAU, ANPEP, ALOX5, HMOX1, APOB, XDH, CTSB, TGFB1, ACE, PTGIS, ANXA1, VCAM1, F10, MMP2, MMP3, MIF, F2, SELE, MMP9, MMP10, VEGFA, IL6, CD40LG, SLPI, COL7A1, IL1B, ALB, LCN2, PECAM1, CHI3L1, REN
GOTERM_CC_DIRECT	GO:0005654~nucleoplasm	72	9.9498e-10	TOP2A, CDKN1A, AKR1B1, AHR, NR3C1, ACTB, NR3C2, HOXA10, LGALS3, CASP8, CCND2, CCND1, GPER1, CASP3, RUVBL2, AKT1, NCOA1, NCOA2, SREBF1, HSP90AA1, ANXA1, CSNK2A1, PRKCB, PRKCD, PRKCA, FOS, MIF, SDHB, AR, CREB1, CSNK2B, RBP1, BIRC5, PPARG, PGR, PPARA, TP53, CEBPB, PRKAA1, DNMT1, HDAC2, ABCB1, NR1I3, HDAC9, RELA, AURKB, HSD11B2, MAPK8, RXRA, ALOX5, ABL1, HMOX1, MAPK1, PPARGC1A, MCL1, ESRRA, JUN, NOS2…
GOTERM_CC_DIRECT	GO:0000785~chromatin	33	1.46223e-09	CEBPB, HDAC2, NR1I3, AHR, NR3C1, RELA, ACTB, NR3C2, HOXA10, RXRA, CCND2, PPARGC1A, NCOA1, ESRRA, SREBF1, NCOA2, JUN, STAT1, VDR, STAT3, NR0B1, FOS, ESR1, ESR2, NFKB1, AR, CREB1, CDK4, CSNK2B, PPARG, PGR, PPARA, TP53
GOTERM_CC_DIRECT	GO:0005737~cytoplasm	88	5.63786e-09	GLTP, TOP2A, ARF1, PLAT, AHR, NR3C1, FGF2, PIK3CG, ACTB, HOXA10, CASP9, IKBKB, LGALS3, CASP8, CCND2, CCND1, ANPEP, GPER1, CASP3, RUVBL2, AKT1, JAK1, NCOA2, SREBF1, HSP90AA1, ANXA1, PRKCB, PRKCD, P3H1, ACSL4, PRKCA, MIF, SULT2B1, AR, ALDH1A2, CSNK2B, ALDH1A1, BIRC5, CHI3L1, PPARG, PGR, TP53, FTL, CEBPB, PRKAA1, HDAC2, NR1I3, ADCY1, TYMS, CYP3A4, PTGS2, HDAC9, FHIT, RELA, PTGS1, MAPK8, CYP2B6, MAP2…
GOTERM_CC_DIRECT	GO:0090575~RNA polymerase II transcription factor complex	11	1.5591e-07	NCOA1, NCOA2, CEBPB, JUN, RXRA, CREB1, STAT1, VDR, STAT3, PPARG, FOS
GOTERM_CC_DIRECT	GO:0005667~transcription factor complex	14	2.09926e-07	NCOA1, NCOA2, JUN, STAT3, AHR, FOS, HDAC9, ESR1, RELA, HOXA10, CREB1, RXRA, CDK4, TP53
GOTERM_CC_DIRECT	GO:0005901~caveola	9	4.54181e-07	PTGIS, NOS3, INSR, KCNMA1, HMOX1, MAPK1, FASLG, PTGS2, SELE
GOTERM_BP_DIRECT	GO:0042493~response to drug	36	1.96402e-28	CDKN1A, HDAC2, NNMT, ABCB1, LPL, ADCY1, TYMS, COMT, PTGS2, SLC6A2, RELA, SLC6A4, ICAM1, HSD11B2, CCND1, CASP3, HMOX1, DRD2, PPARGC1A, SREBF1, NQO1, JUN, TGFB1, ANXA1, STAT1, STAT3, MTHFR, FOS, CREB1, CDK4, CYP1A1, BCL2, CDK1, LCN2, PPARG, TP53
GOTERM_BP_DIRECT	GO:0009410~response to xenobiotic stimulus	29	1.84293e-22	HDAC2, NNMT, ABCB1, LPL, AHR, ADCY1, TYMS, PTGS2, SLC6A2, TNF, SLC6A4, HSD11B2, CCND1, CASP3, ABL1, HMOX1, DRD2, SREBF1, JUN, ACE, SRD5A2, STAT1, MMP2, MTHFR, FOS, CREB1, CDK4, BCL2, CDK1
GOTERM_BP_DIRECT	GO:0043065~positive regulation of apoptotic process	29	9.68271e-19	TOP2A, FASLG, PTGS2, TNF, CASP9, MAPK8, CASP8, CASP3, GPER1, ABL1, CYP1B1, AKT1, HMOX1, MCL1, NCOA1, JUN, TGFB1, ACE, MMP2, MMP9, IL6, CREB1, CDK4, ALDH1A2, KCNMA1, BCL2, BAX, PPARG, TP53
GOTERM_BP_DIRECT	GO:0001666~response to hypoxia	23	3.35286e-18	PRKAA1, TGFB1, ACE, VCAM1, NOS2, CHRNA7, MMP2, MTHFR, PLAT, PLOD1, TNF, SLC6A4, VEGFA, DPP4, HSD11B2, CREB1, PLAU, CASP3, KCNMA1, CYP1A1, HMOX1, DRD2, PPARA
GOTERM_BP_DIRECT	GO:0032496~response to lipopolysaccharide	21	4.34872e-17	JUN, HDAC2, ACE, VCAM1, NOS2, NOS3, FASLG, FOS, OPRM1, COMT, PTGS2, SELE, CASP9, THBD, CASP8, SLPI, IL1B, CASP3, CYP1A1, REN, APOB
GOTERM_BP_DIRECT	GO:0045893~positive regulation of transcription, DNA-templated	35	9.63609e-15	CEBPB, HDAC2, AHR, FGF2, TNF, RELA, ACTB, IKBKB, RXRA, RUVBL2, AKT1, MAPK1, PPARGC1A, NCOA1, ACVR1, KCNH2, ESRRA, JUN, TGFB1, PRKCB, STAT1, INSR, STAT3, FOS, ESR1, ESR2, NFKB1, AR, IL6, CREB1, ASPH, IL1B, PPARG, PPARA, TP53
GOTERM_BP_DIRECT	GO:0045944~positive regulation of transcription from RNA polymerase II promoter	44	3.12116e-14	TOP2A, CEBPB, HDAC2, PLA2G1B, NR1I3, AHR, ADRB2, NR3C1, FGF2, TNF, RELA, HOXA10, IKBKB, RXRA, GPER1, RUVBL2, ABL1, AKT1, DRD2, PPARGC1A, NCOA1, ACVR1, ESRRA, SREBF1, NCOA2, JUN, TGFB1, STAT1, VDR, STAT3, FOS, ESR1, ESR2, NFKB1, VEGFA, NFKBIA, AR, IL6, CREB1, IL1B, PPARG, PGR, PPARA, TP53
GOTERM_BP_DIRECT	GO:0007568~aging	20	3.84583e-14	SREBF1, NQO1, JUN, TGFB1, ACE, VCAM1, MMP2, STAT3, FOS, TYMS, PTGS2, FGF2, RELA, AURKB, CASP9, CREB1, CYP1A1, AKT1, MAPK1, PPARGC1A
GOTERM_BP_DIRECT	GO:0008284~positive regulation of cell proliferation	30	7.07687e-14	PRKAA1, HDAC2, CSF2, PLA2G1B, CHRNA7, FASLG, FGF2, RELA, ACTB, INS, DPP4, CCND2, GPER1, AKT1, HAS2, TGFB1, CSNK2A1, INSR, AKR1C2, MIF, F2, VEGFA, AR, IL6, CDK4, ALDH1A2, IL1B, BCL2, BIRC5, BCL2L1
GOTERM_BP_DIRECT	GO:0010628~positive regulation of gene expression	29	1.32127e-13	PRKAA1, DNMT1, CSF2, FGF2, TNF, RELA, SLC6A4, INS, MAPK8, GPER1, AKT1, MAPK1, APOB, PPARGC1A, TGFB1, NOS3, VDR, STAT3, VEGFA, AR, IL6, CDK6, ALDH1A2, IL1B, CDK1, LCN2, PPARG, PGR, TP53

## Sheet: S3
Supplementary Table S3. KEGG Pathway Enrichment Analysis of the Putative Targets of YJZYT in TE Treatment
Category	Term	Count	PValue	Genes
KEGG_PATHWAY	hsa04151:PI3K-Akt signaling pathway	31	2.01754e-11	CHRM2, CDKN1A, PRKAA1, FASLG, FGF2, RELA, PIK3CG, INS, CASP9, PPP2CA, IKBKB, RXRA, CCND2, CCND1, AKT1, MAPK1, JAK1, MCL1, HSP90AA1, NOS3, INSR, PRKCA, NFKB1, VEGFA, IL6, CREB1, CDK6, CDK4, BCL2, TP53, BCL2L1
KEGG_PATHWAY	hsa04668:TNF signaling pathway	23	3.9821e-16	JUN, CEBPB, VCAM1, CSF2, MMP3, FOS, PTGS2, SELE, TNF, MMP9, RELA, NFKB1, ICAM1, NFKBIA, IKBKB, IL6, MAPK8, CASP8, CREB1, IL1B, CASP3, AKT1, MAPK1
KEGG_PATHWAY	hsa04210:Apoptosis	22	3.1758e-13	JUN, FASLG, FOS, TNF, RELA, NFKB1, ACTB, CASP9, NFKBIA, IKBKB, MAPK8, CASP8, CASP3, BCL2, BAX, BIRC5, AKT1, MAPK1, TP53, CTSB, MCL1, BCL2L1
KEGG_PATHWAY	hsa04657:IL-17 signaling pathway	21	1.95154e-15	JUN, HSP90AA1, CEBPB, CSF2, MMP1, MMP3, FOS, PTGS2, TNF, MMP9, RELA, NFKB1, NFKBIA, IKBKB, IL6, MAPK8, CASP8, IL1B, CASP3, LCN2, MAPK1
KEGG_PATHWAY	hsa04010:MAPK signaling pathway	20	8.25943e-06	JUN, TGFB1, PRKCB, INSR, FASLG, PRKCA, FOS, FGF2, TNF, RELA, NFKB1, INS, VEGFA, IKBKB, MAPK8, IL1B, CASP3, AKT1, MAPK1, TP53
KEGG_PATHWAY	hsa04915:Estrogen signaling pathway	19	3.108e-10	NCOA1, NCOA2, JUN, HSP90AA1, NOS3, MMP2, PRKCD, ADCY1, FOS, OPRM1, ESR1, MMP9, ESR2, CREB1, GPER1, BCL2, AKT1, MAPK1, PGR
KEGG_PATHWAY	hsa01522:Endocrine resistance	17	1.03191e-10	CDKN1A, JUN, MMP2, ADCY1, FOS, ESR1, MMP9, ESR2, MAPK8, CCND1, CDK4, GPER1, BCL2, BAX, AKT1, MAPK1, TP53
KEGG_PATHWAY	hsa04014:Ras signaling pathway	17	2.47823e-05	PLA2G1B, PRKCB, INSR, FASLG, PRKCA, PLD1, FGF2, RELA, NFKB1, INS, VEGFA, IKBKB, MAPK8, ABL1, AKT1, MAPK1, BCL2L1
KEGG_PATHWAY	hsa04064:NF-kappa B signaling pathway	16	2.44829e-09	VCAM1, CSNK2A1, PRKCB, PTGS2, TNF, RELA, NFKB1, ICAM1, NFKBIA, IKBKB, CD40LG, PLAU, IL1B, CSNK2B, BCL2, BCL2L1
KEGG_PATHWAY	hsa04066:HIF-1 signaling pathway	16	4.76881e-09	CDKN1A, NOS2, PRKCB, NOS3, INSR, STAT3, PRKCA, RELA, NFKB1, INS, VEGFA, IL6, BCL2, AKT1, HMOX1, MAPK1
KEGG_PATHWAY	hsa04068:FoxO signaling pathway	15	4.05543e-07	CDKN1A, PRKAA1, TGFB1, INSR, STAT3, FASLG, SLC2A4, INS, IKBKB, IL6, MAPK8, CCND2, CCND1, AKT1, MAPK1
KEGG_PATHWAY	hsa04024:cAMP signaling pathway	15	0.000167473	CHRM2, JUN, ADCY1, FOS, ADRB2, PLD1, RELA, NFKB1, NFKBIA, MAPK8, CREB1, AKT1, MAPK1, DRD2, PPARA
KEGG_PATHWAY	hsa04920:Adipocytokine signaling pathway	14	9.98037e-10	PRKAA1, STAT3, ACSL4, SLC2A4, TNF, RELA, NFKB1, NFKBIA, IKBKB, MAPK8, RXRA, AKT1, PPARA, PPARGC1A
KEGG_PATHWAY	hsa04620:Toll-like receptor signaling pathway	14	1.69758e-07	JUN, STAT1, FOS, TNF, RELA, NFKB1, NFKBIA, IKBKB, IL6, MAPK8, CASP8, IL1B, AKT1, MAPK1
KEGG_PATHWAY	hsa04115:p53 signaling pathway	13	2.282e-08	CDKN1A, CASP9, CASP8, CDK6, CCND2, CCND1, CDK4, CASP3, BCL2, CDK1, BAX, TP53, BCL2L1
KEGG_PATHWAY	hsa01521:EGFR tyrosine kinase inhibitor resistance	12	5.17965e-07	IL6, PRKCB, STAT3, BCL2, BAX, MAPK1, AKT1, PRKCA, FGF2, JAK1, BCL2L1, VEGFA
KEGG_PATHWAY	hsa04152:AMPK signaling pathway	12	3.48355e-05	PPP2CA, SREBF1, PRKAA1, CREB1, CCND1, FASN, INSR, AKT1, PPARG, SLC2A4, PPARGC1A, INS
KEGG_PATHWAY	hsa04630:JAK-STAT signaling pathway	12	0.000581219	IL6, CDKN1A, CSF2, CCND2, CCND1, STAT1, STAT3, BCL2, AKT1, JAK1, BCL2L1, MCL1
KEGG_PATHWAY	hsa04912:GnRH signaling pathway	9	0.000607141	JUN, MAPK8, PRKCB, MMP2, PRKCD, MAPK1, PRKCA, ADCY1, PLD1
KEGG_PATHWAY	hsa04370:VEGF signaling pathway	8	0.000185396	CASP9, PRKCB, NOS3, MAPK1, AKT1, PRKCA, PTGS2, VEGFA

## Sheet: S4
Supplementary table S4. The topological attributes of Four Herbal Medicines Constitutive of YJZYT.(Degree>10)
Name	BetweennessCentrality	ClosenessCentrality	Degree
kaempferol	0.190996	0.355995	45
ursolic acid	0.183939	0.329897	41
Palbinone	0.0959116	0.326161	25
Stigmasterol	0.0777621	0.377457	14
beta-sitosterol	0.103195	0.381457	21
Angelicin	0.0693329	0.318232	14
Azelaic Acid	0.0506173	0.314754	18
Catechin	0.0922475	0.310011	26
Tetrahydroalstonine	0.0260521	0.326161	15
Succinic Acid	0.0228574	0.280976	13
Vanillin	0.0364996	0.34657	12
Sebacic Acid	0.015913	0.280428	12
Vanillin	0.0364996	0.34657	10
Sebacic Acid	0.015913	0.280428	12
(+)-catechin	0.0131136	0.305408	10
